# Supplementary material for: Sodium nitroprusside as an adjunctive treatment for schizophrenia reduces Ndel1 oligopeptidase activity
Source: PubMed Central journal article supplement — Braz J Psychiatry. 2024 Aug 19;46:e20233315. doi: 10.47626/1516-4446-2023-3315 (PMC11474453; doi:10.47626/1516-4446-2023-3315), 2024-08-19
Supplement: bjp-46-e20233315-suppl1.pdf [file bjp-46-e20233315-suppl1.pdf]

**Table S1** Description of the experimental protocol

| <b>Time</b>                               | <b>Procedure</b>                                                                                                              |
|-------------------------------------------|-------------------------------------------------------------------------------------------------------------------------------|
| Enrollment                                | - Routine assessments in the psychiatric ward at HCFMRP-USP<br>- Screening and diagnosis (SCID-IV)                            |
| <b>Monthly trial session</b>              |                                                                                                                               |
| T0 (baseline)                             | - Start of monitoring HR, BP and O <sub>2</sub> saturation<br>- Venous puncture<br>- Clinical evaluation: BPRS, PANSS and UKU |
| <b>Start of infusion (sNP or PLC)</b>     |                                                                                                                               |
| T1 (60 min)                               | - Clinical evaluation: BPRS, PANSS                                                                                            |
| T2 (120 min)                              | - Clinical evaluation: BPRS, PANSS                                                                                            |
| T3 (180 min)                              | - Clinical evaluation: BPRS, PANSS                                                                                            |
| T4 (240 min)                              | - Clinical evaluation: BPRS, PANSS                                                                                            |
| <b>End of infusion</b>                    |                                                                                                                               |
| <b>End of eight experimental sessions</b> |                                                                                                                               |
| Reassessment after 15 days                | - Clinical evaluation: BPRS, PANSS, UKU                                                                                       |
| Reassessment after 30 days                | - Clinical evaluation: BPRS, PANSS, UKU                                                                                       |
| Reassessment after 60 days                | - Clinical evaluation: BPRS, PANSS, UKU                                                                                       |

BP = blood pressure; BPRS = Brief Psychiatric Rating Scale; HCFMRP-USP = Hospital das Clínicas, Faculdade de Medicina de Ribeirão Preto, Universidade de São Paulo; HR = heart rate; PANSS = Positive and Negative Syndrome Scale; PLC = placebo; SCID-IV = Structured Clinical Interview for DSM-IV; sNP = sodium nitroprusside; UKU = Udvalg for Kliniske Undersøgelser.

**Table S2** Clinical characteristics of patients in groups I and II, before (baseline, t = 0) and 4 h after (t = 4) each infusion of placebo or sodium nitroprusside in the first treatment round, namely phase A, comprising four infusions of 4 h each followed by 1-month intervals

|          | Schizophrenia (n=15) |               |            |         |                |               |            |         | Comparative analysis between groups at baseline |         |
|----------|----------------------|---------------|------------|---------|----------------|---------------|------------|---------|-------------------------------------------------|---------|
|          | Group I (n=7)        |               |            |         | Group II (n=8) |               |            |         | Test value                                      | p-value |
|          | t = 0 (before)       | t = 4 (after) | Test value | p-value | t = 0 (before) | t = 4 (after) | Test value | p-value |                                                 |         |
| PANSS    |                      |               |            |         |                |               |            |         |                                                 |         |
| Positive | 9.9 (3.3)            | 7.7 (0.9)     | 4.273      | <0.001* | 16.3 (4.0)     | 10.1 (2.3)    | 10.53      | <0.001* | 7.056                                           | <0.001* |
| Negative | 22.7 (4.3)           | 20.7 (4.2)    | 4.356      | <0.001* | 19.9 (7.1)     | 15.9 (6.0)    | 8.261      | <0.001* | 1.654                                           | 0.103   |
| BPRS     | 12.2 (3.6)           | 6.6 (3.1)     | 9.353      | <0.001* | 15.8 (5.7)     | 7.3 (2.9)     | 10.631     | <0.001* | 2.811                                           | 0.006   |

BPRS = Brief Psychiatric Rating Scale; PANSS = Positive and Negative Syndrome Scale.

\* Statistical significance was defined as  $p \leq 0.05$ .

**Table S3** Clinical characteristics of patients in groups I and II before (baseline, t = 0) and 4 h after (t = 4) infusion of placebo or sodium nitroprusside in the second round of treatment, namely phase B, comprising four infusions of 4 h each followed by one-month intervals

|          | Schizophrenia (n=15) |               |            |         |                |               |            |         | Comparative analysis between groups at baseline |         |
|----------|----------------------|---------------|------------|---------|----------------|---------------|------------|---------|-------------------------------------------------|---------|
|          | Group II (n=8)       |               |            |         | Group I (n=7)  |               |            |         | Test value                                      | p-value |
|          | t = 0 (before)       | t = 4 (after) | Test value | p-value | t = 0 (before) | t = 4 (after) | Test value | p-value |                                                 |         |
| PANSS    |                      |               |            |         |                |               |            |         |                                                 |         |
| Positive | 15.2 (3.6)           | 14.6 (3.1)    | 1.958      | 0.059   | 14.9 (5.3)     | 14.8 (5.2)    | 0.372      | 0.712   | 0.195                                           | 0.846   |
| Negative | 19.3 (7.0)           | 19.2 (6.9)    | 0.387      | 0.701   | 25.5 (5.3)     | 24.4 (6.1)    | 2.143      | 0.040   | 3.940                                           | <0.001* |
| BPRS     | 13.6 (3.1)           | 13.1 (3.1)    | 1.438      | 0.160   | 17.3 (5.0)     | 16.1 (5.3)    | 4.518      | <0.001* | 4.237                                           | <0.001* |

BPRS = Brief Psychiatric Rating Scale; PANSS = Positive and Negative Syndrome Scale.

\* Statistical significance was defined as  $p \leq 0.05$ .

**Table S4** Cardiovascular characteristics of patients in groups I and II before (at baseline, t = 0) and 4 h after (t = 4) each infusion of placebo or sodium nitroprusside in the first and second treatment round, namely phase A and B

| Treatment/<br>cardiovascular<br>parameters | Schizophrenia (n=15)  |              |            |         |                      |              |            |         | Comparative analysis between<br>groups at baseline |         |
|--------------------------------------------|-----------------------|--------------|------------|---------|----------------------|--------------|------------|---------|----------------------------------------------------|---------|
|                                            | Group I (n=7)         |              |            |         | Group II (n=8)       |              |            |         | Test value                                         | p-value |
|                                            | t = 0                 | t = 4        | Test value | p-value | t = 0                | t = 4        | Test value | p-value |                                                    |         |
| Phase A                                    |                       |              |            |         |                      |              |            |         |                                                    |         |
| sBP                                        | 125.2 (16.2)          | 114.5 (16.5) | 4.996      | <0.001* | 124.5 (14.8)         | 112.5 (11.3) | 4.895      | <0.001* | 0.171                                              | 0.864   |
| dBP                                        | 68.6 (10.5)           | 61.45 (13.9) | 3.529      | 0.001*  | 65.3 (8.3)           | 57.8 (8.9)   | 3.046      | 0.004*  | 1.126                                              | 0.212   |
| HR                                         | 96.6 (15.2)           | 104.1 (14.7) | 3.113      | 0.004*  | 92.5 (12.4)          | 96.6 (13.0)  | 1.853      | 0.073   | 1.109                                              | 0.272   |
|                                            | <b>Group II (n=8)</b> |              |            |         | <b>Group I (n=7)</b> |              |            |         |                                                    |         |
| Phase B                                    |                       |              |            |         |                      |              |            |         |                                                    |         |
| sBP                                        | 125.5 (16.2)          | 127.9 (16.5) | 0.939      | 0.355   | 124.5 (13.4)         | 123.8 (12.6) | 0.259      | 0.797   | 0.287                                              | 0.774   |
| dBP                                        | 69.1 (8.6)            | 70.4 (10.3)  | 0.659      | 0.514   | 69.2 (11.1)          | 69.1 (8.9)   | 0.013      | 0.989   | 0.035                                              | 0.972   |
| HR                                         | 89.7 (10.2)           | 88.4 (10.7)  | 0.930      | 0.359   | 91.9 (14.3)          | 98.1 (13.4)  | 2.174      | 0.038*  | 0.684                                              | 0.496   |

Data presented as mean (SD), unless otherwise specified.

dBP = diastolic blood pressure; HR = heart rate; sBP = systolic blood pressure.

\* Statistical significance was defined as  $p \leq 0.05$ .

**Figure S1** Values of A) log Ndel1 activity, B) positive and c) negative PANSS, and D) BPRS for patients in group I and group II before and after each sNP treatment session

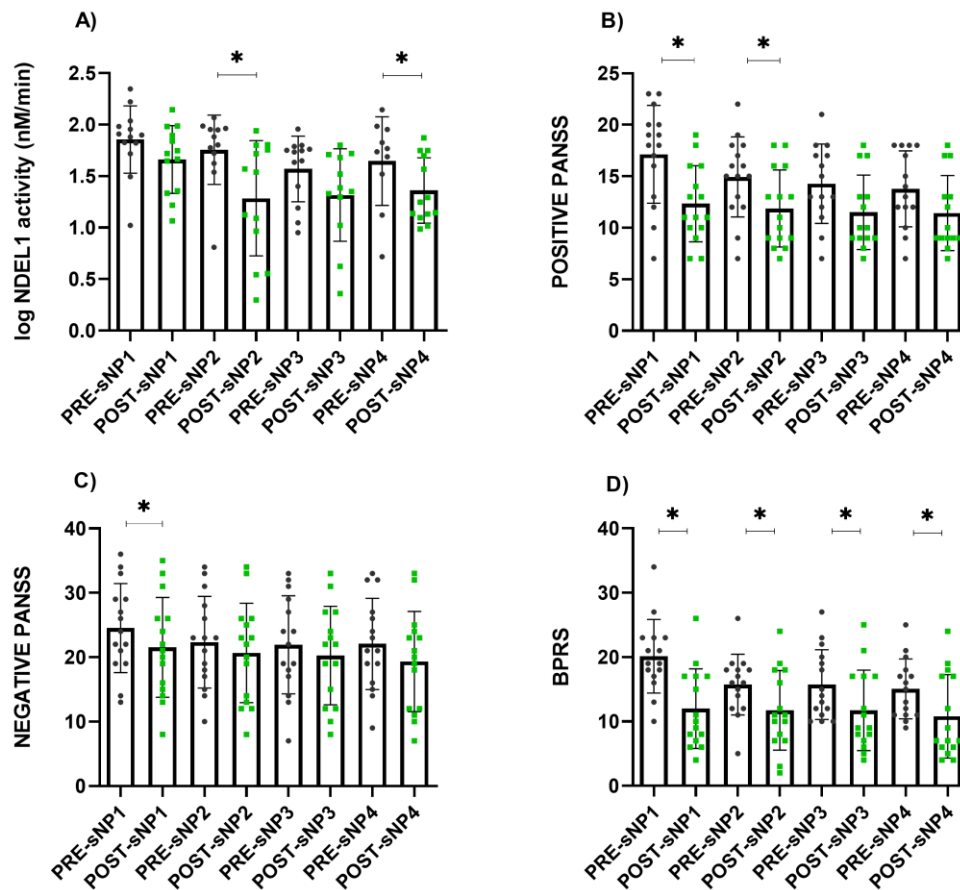

Values represent the four infusion sessions (each session is indicated in the X-axis as sNP1, sNP2, sNP3, and sNP4) of sNP for each patient with schizophrenia, with Ndel1 activity and clinical aspects assessed before and 4 h after infusion. Paired t-test, \*  $p \leq 0.05$ . BPRS = Brief Psychiatric Rating Scale; Ndel1 = nuclear distribution element-like 1; PANSS = Positive and Negative Syndrome Scale; sNP = sodium nitroprusside.

**Figure S2** Delta Ndel1 activity in serum of patients with schizophrenia treated with PLC or sNP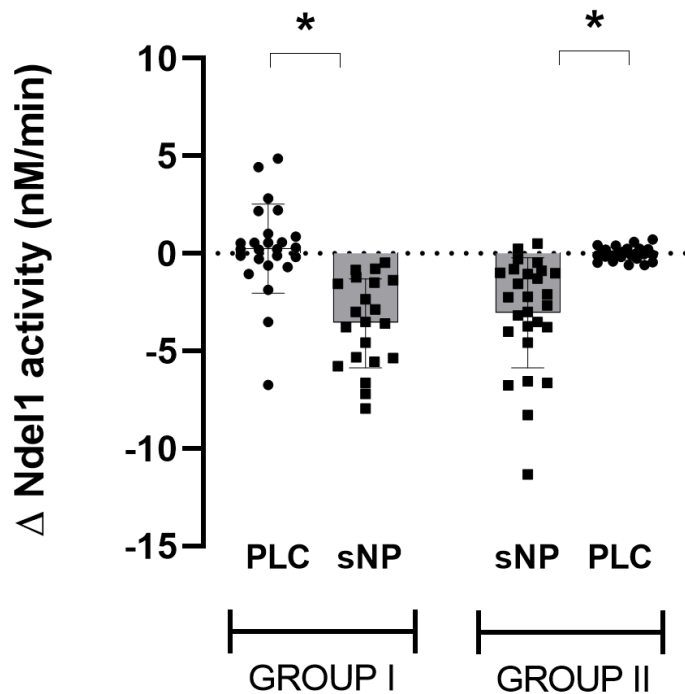

The Ndel1 activity was measured in the serum of all patients with chronic schizophrenia (N = 15) just before (baseline) and 4 h after they have received PLC or sNP infusion. The present data correspond to the  $\Delta$ Ndel1 activity ( $\mu$ M/min) for each double blind-randomized group, namely group I (n=7, placebo first) and group II (n=8, sNP first). The statistical analysis employed paired t-test, \*  $p \leq 0.05$  for the comparison of the values differences observed after the infusion of PLC or sNP minus their respective baseline value. Ndel1 = nuclear distribution element-like 1; PLC = placebo; sNP = sodium nitroprusside.
